# Supplementary material
Source: Royal Society of Chemistry journal article supplement (doi:10.1039/d6gc01352j)
Supplement: d6gc01352j1.pdf [file d6gc01352j1.pdf]

## Supplementary Information

### *In-Situ* Carbon Recovery from Refractory Organics in Wastewater: A Critical

#### Review

Ning Li<sup>a</sup>, Rui Wang<sup>a</sup>, Jianhui Zhao<sup>b,\*</sup>, Xiaoming Peng<sup>c</sup>, Wenchao Peng<sup>d</sup>, Beibei Yan<sup>a</sup>, Guanyi

Chen<sup>a,e,\*</sup>

<sup>a</sup> National Engineering Laboratory of Petrochemical Industrial water Treatment, School of Environmental Science and Engineering, Tianjin University, Tianjin 300072, China

<sup>b</sup> Tianjin Key Laboratory of Aquatic Science and Technology, School of Environmental and Municipal Engineering, Tianjin Chengjian University, Tianjin 300384, China

<sup>c</sup> School of Civil Engineering and Architecture, East China Jiaotong University, Nanchang 330013, China

<sup>d</sup> School of Chemical Engineering and Technology, Tianjin University, Tianjin 300050, China

<sup>e</sup> School of Mechanical Engineering, Tianjin University of Commerce, Tianjin 300134, China

\* Corresponding Authors:

zhaojianhui@tcu.edu.cn; chen@tju.edu.cn (G. Chen)

**Table S1** Summary of representative systems for *in situ* carbon resource recovery of refractory organics

| Treatment technology   | Contaminant          | Conditions                                                                                                                                                                                                                                            | Degradation efficiency (%) | Product                                                                   | Productivity                                                                                                                                                                       | Selectivity (%)      | Refs. |
|------------------------|----------------------|-------------------------------------------------------------------------------------------------------------------------------------------------------------------------------------------------------------------------------------------------------|----------------------------|---------------------------------------------------------------------------|------------------------------------------------------------------------------------------------------------------------------------------------------------------------------------|----------------------|-------|
| Photocatalysis         | Carbamazepine (CBZ)  | [CBZ]=0.02 g/L, [BiOBr/BiVO <sub>4</sub> ]=0.30 g/L, [NaOH]=0.01 M, wavelength range 350 nm $\leq \lambda \leq$ 780 nm, light intensity 160 mW/cm <sup>2</sup> , t=4 h, T=6°C                                                                         | 86.12                      | CO                                                                        | 2.56 $\mu\text{mol}\cdot\text{g}^{-1}\cdot\text{h}^{-1}$                                                                                                                           | 100                  | 1     |
|                        | Methylene Blue (MB)  | [MB]=0.008 g/L, [5%GQDs/V-TiO <sub>2</sub> ]=1.00 g/L, wavelength range 320 nm $\leq \lambda \leq$ 780 nm, light intensity 160 mW/cm <sup>2</sup> , t=8 h, T=6°C                                                                                      | 99                         | CH <sub>3</sub> OH<br>C <sub>2</sub> H <sub>5</sub> OH<br>CH <sub>4</sub> | 13.24 $\mu\text{mol}\cdot\text{g}^{-1}\cdot\text{h}^{-1}$<br>5.65 $\mu\text{mol}\cdot\text{g}^{-1}\cdot\text{h}^{-1}$<br>0.445 $\mu\text{mol}\cdot\text{g}^{-1}\cdot\text{h}^{-1}$ | 68.5<br>29.2<br>2.30 | 2     |
|                        | Rhodamine (RhB)      | [RhB]=0.2 mM, [1%rGO/SrTi <sub>0.95</sub> Fe <sub>0.05</sub> O <sub>3-<math>\sigma</math></sub> ]=1.00 g/L, wavelength range 320 nm $\leq \lambda \leq$ 780 nm, light intensity 160 mW/cm <sup>2</sup> , t=6 h, T=6°C                                 | 90                         | CH <sub>3</sub> OH<br>C <sub>2</sub> H <sub>5</sub> OH                    | 10.76 $\mu\text{mol}\cdot\text{g}^{-1}\cdot\text{h}^{-1}$<br>6.14 $\mu\text{mol}\cdot\text{g}^{-1}\cdot\text{h}^{-1}$                                                              | 63.7<br>36.3         | 3     |
|                        | RhB                  | [RhB]=0.01 g/L, [Ti <sub>3</sub> C <sub>2</sub> T <sub>x</sub> /TiO <sub>2</sub> ]=0.5 g/L, wavelength range 320 nm $\leq \lambda \leq$ 780 nm, light intensity 160 mW/cm <sup>2</sup> , t=1 h                                                        | 77.60                      | CO                                                                        | 10.02 $\mu\text{mol}\cdot\text{g}^{-1}\cdot\text{h}^{-1}$                                                                                                                          | /                    | 4     |
|                        | Phenol               | [Phenol]=0.02 g/L, [Co/In <sub>2</sub> O <sub>3</sub> -550]=0.2 g/L, [[Ru(bpy) <sub>3</sub> ]Cl <sub>2</sub> ·6H <sub>2</sub> O]=0.2 g/L, wavelength range 200 nm $\leq \lambda \leq$ 1200 nm, light intensity 100 mW/cm <sup>2</sup> , t=8 h, T=25°C | 30                         | CO                                                                        | 0.9 $\mu\text{mol}\cdot\text{g}^{-1}\cdot\text{h}^{-1}$                                                                                                                            | /                    | 5     |
|                        | RhB                  | [RhB]=0.01 g/L, [g-C <sub>3</sub> N <sub>4</sub> /Bi/BiVO <sub>4</sub> ]=1.00 g/L, wavelength range 420 nm $\leq \lambda \leq$ 780 nm, light intensity 160 mW/cm <sup>2</sup> , t=1 h                                                                 | 30                         | CO                                                                        | 0.63 $\mu\text{mol}\cdot\text{g}^{-1}\cdot\text{h}^{-1}$                                                                                                                           | /                    | 6     |
| Electrocatalysis -AOPs | 4-nitrophenol (4-NP) | [4-NP]=0.01 g/L, [PMS]=0.5 g/L, anode=Co0.5, cathode=flower-like CuO, U=0.8 V, Na <sub>2</sub> SO <sub>4</sub> (anolyte) = 0.1 M, KHCO <sub>3</sub> (catholyte) = 0.1 M, t=2 h, T=25°C                                                                | 99                         | CH <sub>3</sub> OH<br>C <sub>2</sub> H <sub>5</sub> OH                    | 49.15 $\mu\text{mol}\cdot\text{L}^{-1}\cdot\text{h}^{-1}$<br>20.48 $\mu\text{mol}\cdot\text{L}^{-1}\cdot\text{h}^{-1}$                                                             | 65.7<br>27.4         | 7     |
|                        | Salicylic acid (SA)  | [SA]=0.05 g/L, [PS]=0.02M, anode=MWCNT-CF, cathode=sFe-Cu@MOF, I = 0.025 A, [Na <sub>2</sub> SO <sub>4</sub> (anolyte)]=0.1 M, [KHCO <sub>3</sub> (catholyte)]=0.1 M, t=3 h, T=25°C                                                                   | 99.1±0.9                   | HCOOH                                                                     | 8.00 $\mu\text{mol}\cdot\text{L}^{-1}\cdot\text{h}^{-1}$                                                                                                                           | /                    | 8     |

**Table S1** (continued)

|                        |                    |                                                                                                                                                                                                                                          |       |                 |                                                                                           |             |    |
|------------------------|--------------------|------------------------------------------------------------------------------------------------------------------------------------------------------------------------------------------------------------------------------------------|-------|-----------------|-------------------------------------------------------------------------------------------|-------------|----|
|                        | 4-NP               | [4-NP]=0.01 g/L, [PMS]=0.5 g/L, anode=Co0.5@C, cathode=SnO <sub>2</sub> /CC, U=1.3 V, [Na <sub>2</sub> SO <sub>4</sub> (anolyte)] = 0.1 M, [KHCO <sub>3</sub> (catholyte)] = 0.1 M, t=1 h, T=25°C                                        | 99.0  | HCOOH           | 39.19 μmol·L <sup>-1</sup> ·h <sup>-1</sup>                                               | /           | 9  |
|                        | Phenol             | [Phenol]=0.01 g/L, [Na <sub>2</sub> SO <sub>4</sub> ]=0.1M, anode=Pd-TiO <sub>2</sub> , cathode=Pd-Cu, wavelength range 200 nm≤λ≤1200 nm, light intensity 100 mW/cm <sup>2</sup> , current density=10 mW/cm <sup>2</sup> , t=8 h, T=25°C | 87    | CO              | 60.59 μmol·L <sup>-1</sup> ·h <sup>-1</sup>                                               | 99.8        | 10 |
| Photo-electrocatalysis | Methyl orange (MO) | [MO]=0.02 g/L, anode=TiO <sub>2</sub> -NT, cathode=Ti <sub>3</sub> C <sub>2</sub> , pH(anode)=7.0, pH(cathode)=1.0, wavelength range λ≤254 nm, light intensity 3.60 mW/cm <sup>2</sup> , t=5 h, T=25°C                                   | 74.8  | CH <sub>4</sub> | 5.2 μmol·g <sup>-1</sup> ·h <sup>-1</sup>                                                 | 77.6        | 11 |
|                        | Phenol             | [Phenol]=0.01 g/L, [KOH]=0.5M, anode=Pd QDs@TiO <sub>2</sub> NTPC, cathode=Co <sub>3</sub> O <sub>4</sub> NWs, wavelength range 200 nm≤λ≤1200 nm, light intensity 100 mW/cm <sup>2</sup> , U=3.0V, t=8 h, T=25°C                         | 84.7  | CO<br>HCOOH     | 2.39 μmol·L <sup>-1</sup> ·h <sup>-1</sup><br>43.42 μmol·L <sup>-1</sup> ·h <sup>-1</sup> | 5.2<br>94.8 | 12 |
| Piezocatalysis-AOPs    | Phenol             | [Phenol]=0.01 g/L, [PMS]=3 g/L, [Co <sub>3</sub> S <sub>4</sub> /MoS <sub>2</sub> ]=0.6 g/L, ultrasonic frequency=40 kHz, t=4 h, T=20°C                                                                                                  | 99.90 | CO              | 17.33 μmol·g <sup>-1</sup> ·h <sup>-1</sup>                                               | 74.5        | 13 |

**Table S2** Cost assessment of each technology

| Technology                  | Category                           | Item                                                 | Unit-price |          | Dosage |         | Total (USD) | Cost of category (USD) | Total TOC eliminated (mg) | Cost of category (USD/mg TOC) |
|-----------------------------|------------------------------------|------------------------------------------------------|------------|----------|--------|---------|-------------|------------------------|---------------------------|-------------------------------|
|                             |                                    |                                                      | Value      | Unit     | Value  | Unit    |             |                        |                           |                               |
| Photocatalysis <sup>1</sup> | Electricity                        | Ultrasonic stirrer                                   | 0.07       | USD/kW·h | 0.0004 | kW·h    | 0.00003     | 0.3503                 | 0.8000                    | 0.4378                        |
|                             |                                    | Drying oven                                          | 0.07       | USD/kW·h | 0.0032 | kW·h    | 0.00022     |                        |                           |                               |
|                             |                                    | Centrifugal machine                                  | 0.07       | USD/kW·h | 0.0002 | kW·h    | 0.00001     |                        |                           |                               |
|                             |                                    | Oil pump                                             | 0.07       | USD/kW·h | 0.4000 | kW·h    | 0.02800     |                        |                           |                               |
|                             |                                    | Cryogenic circulating pump                           | 0.07       | USD/kW·h | 3.4000 | kW·h    | 0.23800     |                        |                           |                               |
|                             | Xe lamp                            | 0.07                                                 | USD/kW·h   | 1.20000  | kW·h   | 0.08400 |             |                        |                           |                               |
|                             | Reagent                            | Bi(NO <sub>3</sub> ) <sub>3</sub> ·5H <sub>2</sub> O | 0.44       | USD/g    | 0.0116 | g       | 0.00508     | 0.6988                 | 0.8735                    |                               |
|                             |                                    | Nitric acid                                          | 0.20       | USD/mL   | 0.0600 | ml      | 0.00985     |                        |                           |                               |
|                             |                                    | NH <sub>4</sub> VO <sub>3</sub>                      | 0.50       | USD/g    | 0.0014 | g       | 0.00072     |                        |                           |                               |
|                             |                                    | KBr                                                  | 0.10       | USD/g    | 0.0017 | g       | 0.00018     |                        |                           |                               |
| NaOH                        |                                    | 1.71                                                 | USD/g      | 0.4000   | g      | 0.68300 |             |                        |                           |                               |
| Electricity                 | Drying oven                        | 0.07                                                 | USD/kW·h   | 4.8400   | kW·h   | 0.33880 | 0.4236      | 1.0277                 |                           |                               |
|                             | Tube furnace                       | 0.07                                                 | USD/kW·h   | 1.2000   | kW·h   | 0.08400 |             |                        |                           |                               |
|                             | Ultrasonic stirrer                 | 0.07                                                 | USD/kW·h   | 0.0100   | kW·h   | 0.00070 |             |                        |                           |                               |
|                             | Electrochemical reactor            | 0.07                                                 | USD/kW·h   | 0.0016   | kW·h   | 0.00013 |             |                        |                           |                               |
|                             | Electrocatalysis-AOPs <sup>7</sup> | Co(NO <sub>3</sub> ) <sub>2</sub> ·6H <sub>2</sub> O | 3.18       | USD/g    | 0.0582 | g       |             |                        | 0.18510                   |                               |
| Reagent                     | Ethylene glycol                    | 0.04                                                 | USD/mL     | 1.0000   | mL     | 0.04380 | 2.9972      | 7.2713                 |                           |                               |
|                             | Urea                               | 0.04                                                 | USD/g      | 0.0500   | g      | 0.00209 |             |                        |                           |                               |
|                             | NH <sub>4</sub> F                  | 0.16                                                 | USD/g      | 0.0185   | g      | 0.00295 |             |                        |                           |                               |

**Table S2** (continued)

| Technology                           | Category    | Item                                                          | Unit-price |          | Dosage  |         | Total (USD) | Cost of category (USD) | Total TOC eliminated (mg) | Cost of category (USD/mg TOC) |
|--------------------------------------|-------------|---------------------------------------------------------------|------------|----------|---------|---------|-------------|------------------------|---------------------------|-------------------------------|
|                                      |             |                                                               | Value      | Unit     | Value   | Unit    |             |                        |                           |                               |
| Photo-electrocatalysis <sup>10</sup> | Electricity | Cetyltrimethylammonium bromide                                | 0.43       | USD/g    | 0.0050  | g       | 0.00215     | 0.4278                 | 0.6612                    | 0.6470                        |
|                                      |             | Conductive glass                                              | 0.27       | USD/g    | 0.1650  | g       | 0.04469     |                        |                           |                               |
|                                      |             | NaOH                                                          | 1.71       | USD/g    | 0.6400  | g       | 1.09280     |                        |                           |                               |
|                                      |             | (NH <sub>4</sub> ) <sub>2</sub> S <sub>2</sub> O <sub>8</sub> | 0.07       | USD/g    | 0.1096  | g       | 0.00787     |                        |                           |                               |
|                                      |             | Na <sub>2</sub> WO <sub>4</sub> ·2H <sub>2</sub> O            | 0.67       | USD/g    | 0.0211  | g       | 0.01412     |                        |                           |                               |
|                                      |             | Sodium dodecyl sulfate                                        | 1.88       | USD/g    | 0.0461  | g       | 0.08656     |                        |                           |                               |
|                                      |             | Copper mesh                                                   | 1.60       | USD/g    | 0.0669  | g       | 0.10682     |                        |                           |                               |
|                                      |             | Acetone                                                       | 0.06       | USD/mL   | 10.0000 | mL      | 0.55947     |                        |                           |                               |
|                                      |             | Ethanol                                                       | 0.04       | USD/mL   | 10.0000 | mL      | 0.43943     |                        |                           |                               |
|                                      |             | Na <sub>2</sub> SO <sub>4</sub>                               | 0.43       | USD/g    | 0.8520  | g       | 0.36960     |                        |                           |                               |
|                                      |             | KHCO <sub>3</sub>                                             | 0.06       | USD/g    | 0.6010  | g       | 0.03934     |                        |                           |                               |
|                                      |             | PMS                                                           | 0.24       | USD/g    | 0.0060  | g       | 0.00143     |                        |                           |                               |
|                                      |             | Ultrasonic stirrer                                            | 0.07       | USD/kW·h | 0.0107  | kW·h    | 0.00075     |                        |                           |                               |
|                                      |             | Drying oven                                                   | 0.07       | USD/kW·h | 2.5950  | kW·h    | 0.18165     |                        |                           |                               |
|                                      |             | Tube furnace                                                  | 0.07       | USD/kW·h | 0.3000  | kW·h    | 0.02100     |                        |                           |                               |
|                                      |             | Electrochemical reactor                                       | 0.07       | USD/kW·h | 0.0040  | kW·h    | 0.00028     |                        |                           |                               |
|                                      |             | Magnetic stirrers                                             | 0.07       | USD/kW·h | 0.4002  | kW·h    | 0.02801     |                        |                           |                               |
|                                      | Oil pump    | 0.07                                                          | USD/kW·h   | 0.4000   | kW·h    | 0.00280 |             |                        |                           |                               |
|                                      | Xe lamp     | 0.07                                                          | USD/kW·h   | 2.4000   | kW·h    | 0.16800 |             |                        |                           |                               |
|                                      | Reagent     | Ti                                                            | 1.47       | USD/g    | 0.5063  | g       | 0.74630     | 8.3275                 |                           | 12.5946                       |
| Acetone                              |             | 0.06                                                          | USD/mL     | 10.0000  | mL      | 0.55947 |             |                        |                           |                               |

Table S2 (continued)

| Technology | Category | Item | Unit-price | Dosage | Total | Cost of | Total TOC | Cost of category |
|------------|----------|------|------------|--------|-------|---------|-----------|------------------|
|------------|----------|------|------------|--------|-------|---------|-----------|------------------|

|                                       |             | Value  | Unit     | Value   | Unit | (USD)   | category<br>(USD) | eliminated<br>(mg) | (USD/mg TOC) |
|---------------------------------------|-------------|--------|----------|---------|------|---------|-------------------|--------------------|--------------|
|                                       |             | 0.04   | USD/ml   | 10.0000 | mL   | 0.43943 |                   |                    |              |
|                                       |             | 0.04   | USD/ml   | 10.000  | mL   | 0.43800 |                   |                    |              |
|                                       |             | 0.16   | USD/g    | 0.0333  | g    | 0.00531 |                   |                    |              |
|                                       |             | 1.19   | USD/g    | 0.0800  | g    | 0.09512 |                   |                    |              |
|                                       |             | 739.90 | USD/g    | 0.0009  | g    | 0.67375 |                   |                    |              |
|                                       |             | 0.58   | USD/g    | 0.0300  | g    | 0.01727 |                   |                    |              |
|                                       |             | 1.60   | USD/g    | 0.0669  | g    | 0.10682 |                   |                    |              |
|                                       |             | 0.39   | USD/mL   | 6.0000  | mL   | 2.33958 |                   |                    |              |
|                                       |             | 0.38   | USD/mL   | 6.0000  | mL   | 2.29023 |                   |                    |              |
|                                       |             | 0.43   | USD/g    | 1.4205  | g    | 0.61621 |                   |                    |              |
|                                       |             | 0.07   | USD/kW·h | 0.0002  | kW·h | 0.00001 |                   |                    |              |
|                                       |             | 0.07   | USD/kW·h | 0.8060  | kW·h | 0.05642 |                   |                    |              |
|                                       | Electricity | 0.07   | USD/kW·h | 0.0022  | kW·h | 0.00015 | 0.4346            |                    | 1.5188       |
|                                       |             | 0.07   | USD/kW·h | 0.4000  | kW·h | 0.02800 |                   |                    |              |
|                                       |             | 0.07   | USD/kW·h | 1.6000  | kW·h | 0.11200 |                   |                    |              |
|                                       |             | 0.07   | USD/kW·h | 3.4000  | kW·h | 0.23800 |                   | 0.2861             |              |
| Piezocatalysis-<br>AOPs <sup>13</sup> |             | 0.40   | USD/g    | 0.0120  | g    | 0.00475 |                   |                    |              |
|                                       |             | 2.36   | USD/g    | 0.0085  | g    | 0.02003 |                   |                    |              |
|                                       | Reagent     | 3.18   | USD/g    | 0.0040  | g    | 0.01272 | 0.0746            |                    | 0.2608       |
|                                       |             | 0.57   | USD/mL   | 0.0023  | mL   | 0.00129 |                   |                    |              |
|                                       |             | 0.24   | USD/g    | 0.1500  | g    | 0.03585 |                   |                    |              |

**Table S3** Cost of each technology for *in situ* utilization of carbon resource

| <b>Technologies</b>        | <b>Cost<sub>EE</sub> (\$/mg TOC)</b> | <b>Cost<sub>Reagent</sub> (\$/mg TOC)</b> | <b>Cost<sub>Total</sub> (\$/mg TOC)</b> |
|----------------------------|--------------------------------------|-------------------------------------------|-----------------------------------------|
| Photocatalysis             | 0.44                                 | 0.87                                      | 1.31                                    |
| Electrocatalysis-<br>AOPs  | 1.03                                 | 7.27                                      | 8.30                                    |
| Photo-<br>electrocatalysis | 0.65                                 | 12.59                                     | 13.24                                   |
| Piezocatalysis-<br>AOPs    | 1.52                                 | 0.26                                      | 1.78                                    |

**Table S4.** Life cycle inventory for each technology normalized to the functional unit.

| Technology                         | Stage                | Category | Item                                                          | Value                                                | Unit     |      |
|------------------------------------|----------------------|----------|---------------------------------------------------------------|------------------------------------------------------|----------|------|
| Photocatalysis <sup>1</sup>        | Catalyst preparation | Input    | Bi(NO <sub>3</sub> ) <sub>3</sub> ·5H <sub>2</sub> O          | 0.0145                                               | g        |      |
|                                    |                      |          | Nitric acid                                                   | 0.0048                                               | g        |      |
|                                    |                      |          | Ultrapure water                                               | 1.5759                                               | g        |      |
|                                    |                      |          | NH <sub>4</sub> VO <sub>3</sub>                               | 0.0018                                               | g        |      |
|                                    |                      |          | KBr                                                           | 0.0021                                               | g        |      |
|                                    |                      |          | Ultrasonic stirrer                                            | 0.0005                                               | kw·h     |      |
|                                    |                      |          | Drying oven                                                   | 0.0040                                               | kw·h     |      |
|                                    |                      |          | Centrifugal machine                                           | 0.0003                                               | kw·h     |      |
|                                    |                      |          | Waste liquid discharge                                        | 1.5898                                               | g        |      |
|                                    |                      |          | CBZ                                                           | 0.0025                                               | g        |      |
|                                    | Catalytic reaction   | Input    | Output                                                        | Ultrapure water                                      | 125.0000 | g    |
|                                    |                      |          |                                                               | NaOH                                                 | 0.5000   | g    |
|                                    |                      |          |                                                               | Ar                                                   | 133.8000 | g    |
|                                    |                      |          |                                                               | Xe lamp                                              | 1.5000   | kw·h |
|                                    |                      |          |                                                               | Cryogenic circulating                                | 4.2500   | kw·h |
|                                    |                      |          |                                                               | Oil pump                                             | 0.5000   | kw·h |
|                                    |                      |          |                                                               | Waste liquid discharge                               | 125.4969 | g    |
|                                    |                      |          |                                                               | Emission to air:Ar                                   | 133.8000 | g    |
|                                    |                      |          |                                                               | Co(NO <sub>3</sub> ) <sub>2</sub> ·6H <sub>2</sub> O | 0.1412   | g    |
|                                    |                      |          |                                                               | Ethylene glycol                                      | 2.7001   | g    |
| Electrocatalysis-AOPs <sup>7</sup> | Catalyst preparation | Input    | Urea                                                          | 0.1213                                               | g        |      |
|                                    |                      |          | NH <sub>4</sub> F                                             | 0.0449                                               | g        |      |
|                                    |                      |          | Cetyltrimethylammonium bromide                                | 0.0121                                               | g        |      |
|                                    |                      |          | Conductive glass                                              | 0.4003                                               | g        |      |
|                                    |                      |          | NaOH                                                          | 1.5526                                               | g        |      |
|                                    |                      |          | (NH <sub>4</sub> ) <sub>2</sub> S <sub>2</sub> O <sub>8</sub> | 0.2659                                               | g        |      |
|                                    |                      |          | Na <sub>2</sub> WO <sub>4</sub> ·2H <sub>2</sub> O            | 0.0512                                               | g        |      |
|                                    |                      |          | Sodium dodecyl sulfate                                        | 0.1118                                               | g        |      |
|                                    |                      |          | Copper mesh                                                   | 0.1623                                               | g        |      |
|                                    |                      |          | Acetone                                                       | 19.1897                                              | g        |      |

**Table S4** (*continued*)

| <b>Technology</b>                    | <b>Stage</b>       | <b>Category</b>                 | <b>Item</b>                     | <b>Value</b>            | <b>Unit</b> |      |
|--------------------------------------|--------------------|---------------------------------|---------------------------------|-------------------------|-------------|------|
| Photo-electrocatalysis <sup>10</sup> | Catalytic reaction | Output                          | Ethanol                         | 19.1412                 | g           |      |
|                                      |                    |                                 | Ultrapure water                 | 184.8617                | g           |      |
|                                      |                    |                                 | Waste liquid discharge          | 228.5143                | g           |      |
|                                      |                    |                                 | 4-NP                            | 0.0015                  | g           |      |
|                                      |                    |                                 | Na <sub>2</sub> SO <sub>4</sub> | 2.0670                  | g           |      |
|                                      |                    | Input                           | KHCO <sub>3</sub>               | 1.4580                  | g           |      |
|                                      |                    |                                 | PMS                             | 0.0146                  | g           |      |
|                                      |                    |                                 | Electrochemical reactor         | 0.0039                  | kw·h        |      |
|                                      |                    |                                 | Waste liquid discharge          | 294.6616                | g           |      |
|                                      |                    |                                 | Ti                              | 0.7657                  | g           |      |
|                                      |                    | Catalyst preparation            | Output                          | Acetone                 | 11.9631     | g    |
|                                      |                    |                                 |                                 | Ethanol                 | 11.9328     | g    |
|                                      |                    |                                 |                                 | Ethylene glycol         | 16.4398     | g    |
|                                      |                    |                                 |                                 | NH <sub>4</sub> F       | 0.0504      | g    |
|                                      |                    |                                 |                                 | Polyvinylpyrrolidone    | 0.1210      | g    |
|                                      | Input              |                                 | PdCl <sub>2</sub>               | 0.0014                  | g           |      |
|                                      |                    |                                 | NaI                             | 0.0454                  | g           |      |
|                                      |                    |                                 | Copper mesh                     | 0.1012                  | g           |      |
|                                      |                    |                                 | HCl                             | 0.5522                  | g           |      |
|                                      |                    |                                 | H <sub>3</sub> PO <sub>4</sub>  | 13.2184                 | g           |      |
|                                      | Catalytic reaction |                                 | Output                          | Ultrapure water         | 201.1494    | g    |
|                                      |                    |                                 |                                 | Ultrasonic stirrer      | 0.0162      | kw·h |
|                                      |                    |                                 |                                 | Drying oven             | 3.9247      | kw·h |
|                                      |                    |                                 |                                 | Tube furnace            | 0.4537      | kw·h |
|                                      |                    |                                 |                                 | Electrochemical reactor | 0.0042      | kw·h |
|                                      |                    | Magnetic stirrers               |                                 | 0.0003                  | kw·h        |      |
|                                      |                    | Waste liquid discharge          |                                 | 266.9239                | g           |      |
|                                      |                    | Na <sub>2</sub> SO <sub>4</sub> |                                 | 2.1484                  | g           |      |
|                                      |                    | Phenol                          |                                 | 0.0015                  | g           |      |
|                                      |                    | N <sub>2</sub>                  |                                 | 3.3727                  | g           |      |
| Catalytic reaction                   | Input              | Ultrapure water                 | 151.2402                        | g                       |             |      |
|                                      |                    | Oil pump                        | 0.6050                          | kw·h                    |             |      |
|                                      |                    |                                 | Electrochemical reactor         | 0.0018                  | kw·h        |      |

**Table S4** (continued)

| <b>Technology</b>                     | <b>Stage</b>            | <b>Category</b> | <b>Item</b>                                                                       | <b>Value</b>           | <b>Unit</b> |   |
|---------------------------------------|-------------------------|-----------------|-----------------------------------------------------------------------------------|------------------------|-------------|---|
| Piezocatalysis-<br>AOPs <sup>13</sup> | Catalyst<br>preparation | Output          | Xe lamp                                                                           | 3.6298                 | kw·h        |   |
|                                       |                         |                 | Magnetic stirrers                                                                 | 0.6050                 | kw·h        |   |
|                                       |                         |                 | Waste liquid discharge                                                            | 153.3878               | g           |   |
|                                       |                         |                 | Emission to air: CO                                                               | 0.0023                 | g           |   |
|                                       |                         |                 | Emission to air: N <sub>2</sub>                                                   | 3.3727                 | g           |   |
|                                       |                         |                 | H <sub>24</sub> Mo <sub>7</sub> N <sub>6</sub> O <sub>24</sub> ·4H <sub>2</sub> O | 0.0419                 | g           |   |
|                                       |                         |                 | C <sub>2</sub> H <sub>5</sub> NS                                                  | 0.0297                 | g           |   |
|                                       |                         | Input           | Co(NO <sub>3</sub> ) <sub>2</sub> ·6H <sub>2</sub> O                              | 0.0140                 | g           |   |
|                                       |                         |                 | H <sub>4</sub> N <sub>2</sub> ·H <sub>2</sub> O                                   | 0.0783                 | g           |   |
|                                       |                         |                 | Ultrapure water                                                                   | 25.8235                | g           |   |
|                                       |                         |                 | Magnetic stirrers                                                                 | 0.0007                 | kw·h        |   |
|                                       |                         |                 | Drying oven                                                                       | 2.8172                 | kw·h        |   |
|                                       |                         |                 | Water bath stirrer                                                                | 0.0077                 | kw·h        |   |
|                                       |                         |                 | Waste liquid discharge                                                            | 25.9567                | g           |   |
|                                       | Catalytic<br>reaction   | Output          | Emission to air: NH <sub>3</sub>                                                  | 0.0021                 | g           |   |
|                                       |                         |                 | Emission to air: SO <sub>2</sub>                                                  | 0.0024                 | g           |   |
|                                       |                         |                 | PMS                                                                               | 0.5243                 | g           |   |
|                                       |                         |                 | Ar                                                                                | 374.1349               | g           |   |
|                                       |                         |                 | Phenol                                                                            | 0.0017                 | g           |   |
|                                       |                         |                 | Ultrapure water                                                                   | 174.7641               | g           |   |
|                                       |                         | Input           | Oil pump                                                                          | 1.3981                 | kw·h        |   |
|                                       |                         |                 | Ultrasonic generator                                                              | 5.5925                 | kw·h        |   |
|                                       |                         |                 | Cryogenic circulating<br>pump                                                     | 11.8840                | kw·h        |   |
|                                       |                         |                 | Output                                                                            | Waste liquid discharge | 175.2898    | g |
|                                       |                         |                 |                                                                                   | Emission to air:Ar     | 374.1349    | g |

**Table S5.** Results for the different systems/stages per functional unit (CML-IA baseline (World 2000))

| Impact category                     | Unit                                | Photocatalysis        |                       |                       | Electrocatalysis      |                       |                       | Photo-electrocatalysis |                       |                       | Piezocatalysis        |                       |                       |
|-------------------------------------|-------------------------------------|-----------------------|-----------------------|-----------------------|-----------------------|-----------------------|-----------------------|------------------------|-----------------------|-----------------------|-----------------------|-----------------------|-----------------------|
|                                     |                                     | Total                 | Preparation           | Reaction              | Total                 | Preparation           | Reaction              | Total                  | Preparation           | Reaction              | Total                 | Preparation           | Reaction              |
| Abiotic depletion                   | kg Sb eq                            | $3.51 \times 10^{-6}$ | $1.26 \times 10^{-7}$ | $3.39 \times 10^{-6}$ | $2.33 \times 10^{-5}$ | $2.33 \times 10^{-5}$ | $2.22 \times 10^{-9}$ | $5.79 \times 10^{-6}$  | $3.22 \times 10^{-6}$ | $2.57 \times 10^{-6}$ | $1.06 \times 10^{-5}$ | $1.64 \times 10^{-6}$ | $8.99 \times 10^{-6}$ |
| Abiotic depletion<br>(fossil fuels) | MJ                                  | $5.57 \times 10^1$    | 3.29                  | $5.24 \times 10^1$    | $1.32 \times 10^2$    | $1.32 \times 10^2$    | $3.43 \times 10^{-2}$ | $7.85 \times 10^1$     | $3.88 \times 10^1$    | $3.97 \times 10^1$    | $1.46 \times 10^2$    | $2.56 \times 10^1$    | $1.21 \times 10^2$    |
| Global warming<br>(GWP 100a)        | kg CO <sub>2</sub> eq               | 6.22                  | $3.01 \times 10^{-1}$ | 5.92                  | $1.48 \times 10^1$    | $1.48 \times 10^1$    | $3.88 \times 10^{-3}$ | 8.71                   | 4.22                  | 4.49                  | $1.34 \times 10^1$    | 2.35                  | $1.11 \times 10^1$    |
| Ozone layer<br>depletion (ODP)      | kg CFC-11 eq                        | $6.35 \times 10^{-8}$ | $1.52 \times 10^{-8}$ | $4.83 \times 10^{-8}$ | $1.28 \times 10^{-7}$ | $1.28 \times 10^{-7}$ | 3.16E-11              | $7.90 \times 10^{-8}$  | $4.24 \times 10^{-8}$ | $3.66 \times 10^{-8}$ | $6.38 \times 10^{-7}$ | $1.14 \times 10^{-7}$ | $5.24 \times 10^{-7}$ |
| Human toxicity                      | kg 1,4-DB eq                        | 2.21                  | $1.14 \times 10^{-1}$ | 2.10                  | 5.32                  | 5.32                  | $1.37 \times 10^{-3}$ | 3.14                   | 1.55                  | 1.59                  | 5.45                  | $9.37 \times 10^{-1}$ | 4.51                  |
| Fresh water<br>aquatic ecotoxicity  | kg 1,4-DB eq                        | 2.47                  | $1.23 \times 10^{-1}$ | 2.35                  | 5.88                  | 5.87                  | $1.54 \times 10^{-3}$ | 3.47                   | 1.69                  | 1.78                  | 7.81                  | 1.26                  | 6.55                  |
| Marine aquatic<br>ecotoxicity       | kg 1,4-DB eq                        | $1.00 \times 10^4$    | $4.68 \times 10^2$    | $9.55 \times 10^3$    | $2.38 \times 10^4$    | $2.38 \times 10^4$    | 6.25                  | $1.40 \times 10^4$     | $6.76 \times 10^3$    | $7.24 \times 10^3$    | $2.19 \times 10^4$    | $3.79 \times 10^3$    | $1.81 \times 10^4$    |
| Terrestrial<br>ecotoxicity          | kg 1,4-DB eq                        | $2.27 \times 10^{-2}$ | $6.03 \times 10^{-4}$ | $2.21 \times 10^{-2}$ | $5.52 \times 10^{-2}$ | $5.52 \times 10^{-2}$ | $1.45 \times 10^{-5}$ | $3.23 \times 10^{-2}$  | $1.56 \times 10^{-2}$ | $1.68 \times 10^{-2}$ | $6.33 \times 10^{-2}$ | $9.39 \times 10^{-3}$ | $5.39 \times 10^{-2}$ |
| Photochemical<br>oxidation          | kg C <sub>2</sub> H <sub>4</sub> eq | $1.04 \times 10^{-3}$ | $5.17 \times 10^{-5}$ | $9.89 \times 10^{-4}$ | $2.52 \times 10^{-3}$ | $2.52 \times 10^{-3}$ | $6.47 \times 10^{-7}$ | $1.51 \times 10^{-3}$  | $7.61 \times 10^{-4}$ | $7.50 \times 10^{-4}$ | $2.34 \times 10^{-3}$ | $4.07 \times 10^{-4}$ | $1.93 \times 10^{-3}$ |
| Acidification                       | kg SO <sub>2</sub> eq               | $2.78 \times 10^{-2}$ | $1.31 \times 10^{-3}$ | $2.64 \times 10^{-2}$ | $6.62 \times 10^{-2}$ | $6.62 \times 10^{-2}$ | $1.73 \times 10^{-5}$ | $3.91 \times 10^{-2}$  | $1.91 \times 10^{-2}$ | $2.00 \times 10^{-2}$ | $5.91 \times 10^{-2}$ | $1.03 \times 10^{-2}$ | $4.88 \times 10^{-2}$ |
| Eutrophication                      | kg PO <sub>4</sub> <sup>3-</sup> eq | $6.69 \times 10^{-3}$ | $6.35 \times 10^{-4}$ | $6.05 \times 10^{-3}$ | $1.53 \times 10^{-2}$ | $1.53 \times 10^{-2}$ | $3.96 \times 10^{-6}$ | $9.10 \times 10^{-3}$  | $4.52 \times 10^{-3}$ | $4.59 \times 10^{-3}$ | $2.83 \times 10^{-2}$ | $4.94 \times 10^{-3}$ | $2.34 \times 10^{-2}$ |

## References:

1. L.-L. Zheng, L. Tian, L.-S. Zhang, J. Yu, Y. Chen, Q. Fu, X.-Z. Liu, D.-S. Wu and J.-P. Zou, *ACS Catalysis*, 2024, **14**, 2134-2143.
2. J.-P. Zou, D.-D. Wu, J. Luo, Q.-J. Xing, X.-B. Luo, W.-H. Dong, S.-L. Luo, H.-M. Du and S. L. Suib, *ACS Catalysis*, 2016, **6**, 6861-6867.
3. W.-H. Dong, D.-D. Wu, J.-M. Luo, Q.-J. Xing, H. Liu, J.-P. Zou, X.-B. Luo, X.-B. Min, H.-L. Liu, S.-L. Luo and C.-T. Au, *Journal of Catalysis*, 2017, **349**, 218-225.
4. X. Wu, J. Li, R. Zhong, S. Liu, F. Huang, Q. Yang, B. Zhang, X. Wang and F. Zhang, *Advanced Functional Materials*, 2024, **34**, 2405868.
5. Q. Liang, S. Zhao, Z. Li, Z. Wu, H. Shi, H. Huang and Z. Kang, *ACS Applied Materials & Interfaces*, 2021, **13**, 40754-40765.
6. Q. Xie, W. He, S. Liu, C. Li, J. Zhang and P. K. Wong, *Chinese Journal of Catalysis*, 2020, **41**, 140-153.
7. J.-P. Zou, Y. Chen, S.-S. Liu, Q.-J. Xing, W.-H. Dong, X.-B. Luo, W.-L. Dai, X. Xiao, J.-M. Luo and J. Crittenden, *Water Research*, 2019, **150**, 330-339.
8. M. Priyadarshini, A. Ahmad, S. Yadav and M. M. Ghangrekar, *Chemical Engineering Journal*, 2023, **478**, 147343.
9. M. Zhu, L. Zhang, S. Liu, D. Wang, Y. Qin, Y. Chen, W. Dai, Y. Wang, Q. Xing and J. Zou, *Chinese Chemical Letters*, 2020, **31**, 1961-1965.
10. R. Cui, Q. Shen, C. Guo, B. Tang, N. Yang and G. Zhao, *Applied Catalysis B: Environmental*, 2020, **261**, 118253.

11. J. Zhang, S. Lv, J. Zheng, P. Yang, J. Li, X. Wu, T. Jin, C. Cheng, Y. Song and L. Li, *ACS Sustainable Chemistry & Engineering*, 2020, **8**, 11133-11140.
12. Q. Shen, S. Xu, R. Cui, C. Guo and G. Zhao, *Chemical Engineering Journal*, 2023, **471**, 144422.
13. M. Ran, H. Xu, Y. Bao, Y. Zhang, J. Zhang and M. Xing, *Angewandte Chemie International Edition*, 2023, **62**, e202303728.
